# Supplementary material
Source: publisher figshare collection journal article supplement (https://frontiersin.figshare.com/ndownloader/files/28239960)
Supplement: Supplementary file 1 [file 28239960]

## Sheet: Sheet1
Table S2. Species of the sponges considered in this study and their references.
Order	Family	Species	Reference
Agelasida	Agelasidae	Agelas oroides	Pansini and Daglio, 1980; Koukouras et al. 1985; Koukouras et al., 1996; Gerovasileiou et al., 2016
Dictyoceratida	Irciniidae	Ircinia fasciculata	Koukouras et al. 1985; Alos et al., 1981
Dictyoceratida	Irciniidae	Ircinia oros	Papatheodoulou et al., 2019
Dictyoceratida	Irciniidae	Ircinia variabilis	Pansini and Daglio, 1980; Papatheodoulou et al.; 2019 Goren et al., 2021
Dictyoceratida	Irciniidae	Sarcotragus foetidus	Koukouras et al. 1985; Cinar and Ergen, 1998; Pavloudi et al., 2016; Çinar et al., 2019
Dictyoceratida	Irciniidae	Sarcotragus spinosulus	Papatheodoulou et al.; 2019, Goren et al., 2021
Dictyoceratida	Spongiidae	Spongia officinalis	Pansini and Daglio, 1980; Koukouras et al. 1985; Papatheodoulou et al., 2019
Dictyoceratida	Thorectidae	Fasciospongia cavernosa	Goren et al., 2021
Haplosclerida	Petrosiidae	Petrosia ficiformis	Pansini and Daglio, 1980; Koukouras et al. 1985; Alos et al., 1981
Tetractinellida	Geodiidae	Geodia cydonium	Santucci, 1922; Gherardi et al., 2001; Koukouras et al. 1985
Verongida	Aplysinidae	Aplysina aerophoba	Koukouras et al. 1985; Koukouras et al., 1996; Voultsiadou-Koukoura et al., 1987; Gerovasileiou et al., 2016; Alos et al., 1981
